# Supplementary material for: Molecular Characterization of a Novel Avian Influenza A (H2N9) Strain Isolated from Wild Duck in Korea in 2018
Source: PubMed Central journal article supplement (PMC6893532; doi:10.3390/v11111046), 2019-11-10
Supplement: viruses-11-01046-s001.pdf [file viruses-11-01046-s001.pdf]

## Supplementary information

### Molecular characterization of a novel avian influenza A (H2N9) strain isolated from wild duck in Korea in 2018

Seon-Ju Yeo\*1, Duc Duong Than\*1, Hong-Seog Park2, Haan Woo Sung§3, Hyun Park§1

**Fig. S1. Information of bird species identification**

**Table S1. Initial input of barcoding**

**Table S2. Detailed NGS analysis**

**Table S3. Amino acid residues of the NA, PB2, PB1, PA, NP, NS1 and M1 gene of A/wild duck/ Korea/K102/2018 (H2N9)**

### Reference

**All phylogenetic trees.(HA, M, NA, NP, NS, PA, PB1, PB2)**

# BOLD TaxonID Taxonomy Report

| Order                                   | Family                              | Species                                       |
|-----------------------------------------|-------------------------------------|-----------------------------------------------|
| Anseriformes[99 individuals][4 species] |                                     |                                               |
|                                         | Anatidae[99 individuals][4 species] |                                               |
|                                         |                                     | Anas platyrhynchos[81 individuals]            |
|                                         |                                     | Anas platyrhynchos x A. crecca[1 individuals] |
|                                         |                                     | Anas poecilorhyncha[16 individuals]           |
|                                         |                                     | Tadorna tadorna[1 individuals]                |

**Fig. S1. Information of bird species identification**

**Table S1. Initial input of barcoding**

AACGTGATCGTCACCGCTCACGCCTTCGTAATAATCTTCTTCATGGTAATGCCATCATAATTGGAGGGTTCGGCAACTGATTGGTCCCCCTGATAATCGGTGCCCCGACATAGCATTCCCACGAATAAACAACATAAGCTTCT  
GACTCCTCCCACCATATTCCTCCTTCTACTCGCCTCATCCACTGTAGAAGCTGGCGCTGGTACGGGTTGAACCGTATACCCACCTTAGCAGGCAACCTAGCCCACGCCGAGCCTCAGAGGACCTGGCTATCTTCTCACTT  
ACCTGGCTGGTGTCTCCTCCATCCTCGGAGCCATTAACCTTACACACAGCCATCAACATAAAACCCCCGCACTCTCACAATACCAAACCCCACTTTTCGTCTGATCAGTCCTAATTACCGCCATCCTGCTCCTCCTACTACT  
CCCCGTCTCGCCGCCGCATCACAAATGCTACTAACCGACCGAAACCTAAACACCACATTCTTTGATCCTGCCGGAGGGCGAGACACAATCCTGTACCAACACCT

**Table S2. Detailed NGS analysis**

| Sample | Reference |             |                                |              |                                                                                                                                                                           |        | Sequenced Sample         |                                      |                                |               |          |                |          | R_ORF      |        |            | S_ORF      |        |            | method | R_ORF-S_ORF length  | Contig Count |            |
|--------|-----------|-------------|--------------------------------|--------------|---------------------------------------------------------------------------------------------------------------------------------------------------------------------------|--------|--------------------------|--------------------------------------|--------------------------------|---------------|----------|----------------|----------|------------|--------|------------|------------|--------|------------|--------|---------------------|--------------|------------|
|        | Segment#  | gene name   | desc.                          | Accession_ID | desc. all                                                                                                                                                                 | ref bp | # of Pre-processed reads | # of Influenza Virus extracted reads | # of non-Influenza Virus reads | Virus reads % | #M_Reads | Unique Matches | S_Con_bp | %Cov.(S/R) | Length | S_position | E_position | Length | S_position |        |                     |              | E_position |
| K102   | 1         | PB2         | A/duck/Guangdong/707/2000/H2N9 | KF260787     | gi 523793430 gb KF260787 Influenza A virus (A/duck/Guangdong/707/2000(H2N9)) segment 1 polymerase PB2 (PB2) gene, complete cds                                            | 2280   | 23263654                 | 2186688                              | 21076966                       | 0.103748      | 17148    | 0.029          | 2292     | 1          | 2280   | 1          | 2280       | 2274   | 19         | 2292   | standard :segment 8 | 6            | 1          |
|        | 2         | PB1, PB1-F2 |                                | KF260543     | gi 523792777 gb KF260543 Influenza A virus (A/duck/Guangdong/707/2000(H2N9)) segment 2 polymerase PB1 (PB1) and PB1-F2 protein (PB1-F2) genes, complete cds               | 2277   |                          |                                      |                                |               | 17999    | 0.03           | 2280     | 1          | 2274   | 1          | 2274       | 2274   | 3          | 2276   |                     | 0            | 1          |
|        | 3         | PA, PA-X    |                                | KF260299     | gi 523792051 gb KF260299 Influenza A virus (A/duck/Guangdong/707/2000(H2N9)) segment 3 polymerase PA (PA) and PA-X protein (PA-X) genes, complete cds                     | 2151   |                          |                                      |                                |               | 16372    | 0.027          | 2151     | 1          | 2151   | 1          | 2151       | 2151   | 1          | 2151   |                     | 0            | 1          |
|        | 4         | HA          |                                | KF258945     | gi 523788781 gb KF258945 Influenza A virus (A/duck/Guangdong/707/2000(H2N9)) segment 4 hemagglutinin (HA) gene, complete cds                                              | 1689   |                          |                                      |                                |               | 53303    | 0.089          | 1688     | 1          | 1689   | 1          | 1689       | 1689   | 1          | 1689   |                     | 0            | 1          |
|        | 5         | NP          |                                | KF259811     | gi 523790757 gb KF259811 Influenza A virus (A/duck/Guangdong/707/2000(H2N9)) segment 5 nucleocapsid protein (NP) gene, complete cds                                       | 1497   |                          |                                      |                                |               | 97019    | 0.162          | 1505     | 0.99       | 1497   | 1          | 1497       | 1506   | 1          | 1506   |                     | -9           | 1          |
|        | 6         | NA          |                                | KF259722     | gi 523790579 gb KF259722 Influenza A virus (A/duck/Guangdong/707/2000(H2N9)) segment 6 neuraminidase (NA) gene, complete cds                                              | 1413   |                          |                                      |                                |               | 4713     | 0.008          | 1419     | 0.9795     | 1413   | 1          | 1413       | 1395   | 5          | 1399   |                     | 18           | 1          |
|        | 7         | M2, M1      |                                | KF259292     | gi 523789549 gb KF259292 Influenza A virus (A/duck/Guangdong/707/2000(H2N9)) segment 7 matrix protein 2 (M2) and matrix protein 1 (M1) genes, complete cds                | 982    |                          |                                      |                                |               | 333564   | 0.556          | 980      | 0.999      | 759    | 1          | 759        | 759    | 1          | 759    |                     | 0            | 1          |
|        | 8         | NEP, NS1    |                                | KF260055     | gi 523791319 gb KF260055 Influenza A virus (A/duck/Guangdong/707/2000(H2N9)) segment 8 nuclear export protein (NEP) and nonstructural protein 1 (NS1) genes, complete cds | 845    |                          |                                      |                                |               | 35329    | 0.059          | 822      | 0.9728     | 693    | 1          | 693        | 690    | 2          | 691    |                     | 3            | 1          |

**Table S3.** Amino acid residues of the NA, PB2, PB1, PA, NP, NS1 and M1 gene of A/wild duck/ Korea/K102/2018 (H2N9)

| Gene segments | Amino acid | K/2018 <sup>a</sup> | S/2013 <sup>b</sup> | A/2013 <sup>c</sup> | H/MPL133 <sup>d</sup> | H/MPL961 <sup>e</sup> | Comments                                                                                   | Reference  |
|---------------|------------|---------------------|---------------------|---------------------|-----------------------|-----------------------|--------------------------------------------------------------------------------------------|------------|
| NA            | M26I       | I                   | I                   | I                   | I                     | I                     | M26I: Increased virulence in mice                                                          | [1]        |
|               | I107V      | V                   | V                   | V                   | V                     | V                     | I107V: Increased virulence in mice                                                         | [2]        |
|               | R144K      | K                   | K                   | K                   | K                     | K                     | R144K: Increased virulence in mice and mammals                                             | [3]        |
|               | N146S      | S                   | S                   | S                   | S                     | S                     | N147S: Increased virulence in mammals                                                      | [1]        |
|               | T224I      | I                   | I                   | I                   | I                     | I                     | T224I: Increased virulence in mammals                                                      | [4-5]      |
| PB2           | L89V       | V                   | V                   | V                   | V                     | V                     | L89V: Enhanced polymerase activity. Increased virulence in mice                            | [6-7]      |
|               | K251R      | R                   | R                   | R                   | R                     | R                     | K251R: Increased virulence in mice                                                         | [8]        |
|               | G309D      | D                   | D                   | D                   | D                     | D                     | G309D: Enhanced polymerase activity. Increased virulence in mice                           | [7]        |
|               | H447Q      | Q                   | Q                   | Q                   | Q                     | Q                     | H447Q: Increased polymerase activity. Increased virulence in mammals.                      | [9-10]     |
| PB1           | D/A3V      | V                   | V                   | V                   | V                     | V                     | D/A3V: Increased polymerase activity. Increased virulence in mammals.                      | [9-10]     |
|               | V13P       | P                   | P                   | P                   | P                     | P                     | V13P: Increased polymerase activity. Increased virulence in mammals. Mammalian host marker | [11-12]    |
|               | R207K      | K                   | K                   | K                   | K                     | K                     | R207K: Increased polymerase activity in mammalian cells                                    | [13]       |
|               | S375N/T    | N                   | N                   | N                   | N                     | N                     | S375N/T: Increased polymerase activity. Increased virulence in mammals. Human host marker  | [9-10, 14] |
| PA            | H266R      | R                   | R                   | R                   | R                     | R                     | H266R: Increased polymerase activity. Increased virulence in mammals and birds             | [15]       |
|               | F277S      | S                   | S                   | S                   | S                     | S                     | F277S: contributed to the virulence and mammalian adaptation                               | [16]       |
|               | S515T      | T                   | T                   | T                   | T                     | T                     | S515T: Increased polymerase activity. Increased virulence in mammals and birds             | [13, 15]   |

|     |       |   |   |   |   |   |                                                            |         |
|-----|-------|---|---|---|---|---|------------------------------------------------------------|---------|
|     | V41I  | I | I | I | I | I | V41I: Contribute to viral transmissibility                 | [17]    |
| NP  | A184K | K | K | K | K | K | A184K: Increased the replication and pathogenicity of H5N1 | [18-19] |
|     | D210E | E | E | E | E | E | D210E: Contribute to viral transmissibility                | [17]    |
| NS1 | P42S  | S | S | S | S | S | P42S: Increased virulence in mice                          | [20-21] |
| M1  | N30D  | D | D | D | D | D | N30D: Increased virulence in mice                          | [22-23] |
|     | T215A | A | A | A | A | A | T215A: Increased virulence in mice                         | [22-23] |

<sup>a</sup>K/2018, A/wild duck/Korea/K102/2018 (H2N9);

<sup>b</sup>S/2013, A/Shanghai/1/2013 (H7N9-human isolate)

<sup>c</sup>A/2013, A/Anhui/1/2013 (H7N9-human isolate)

<sup>d</sup>H/MPL133, A/northern shoveler/Hong Kong/MPL133/2010 (H2N9);

<sup>e</sup>H/MPL961, A/northern shoveler/Hong Kong/MPL961/2011(H2N9);

## Reference

1. Mok, C. K. P.; Lee, H. H. Y.; Lestra, M.; Nicholls, J. M.; Chan, M. C. W.; Sia, S. F.; Zhu, H.; Poon, L. L. M.; Guan, Y.; Peiris, J. S. M., Amino acid substitutions in polymerase basic protein 2 gene contribute to the pathogenicity of the novel A/H7N9 influenza virus in mammalian hosts. *Journal of virology* 2014, 88 (6), 3568-3576.
2. Yen, H.-L.; Aldridge, J. R.; Boon, A. C.; Ilyushina, N. A.; Salomon, R.; Hulse-Post, D. J.; Marjuki, H.; Franks, J.; Boltz, D. A.; Bush, D., Changes in H5N1 influenza virus hemagglutinin receptor binding domain affect systemic spread. *Proceedings of the National Academy of Sciences* 2009, 106 (1), 286-291.
3. Mishin, V. P.; Sleeman, K.; Levine, M.; Carney, P. J.; Stevens, J.; Gubareva, L. V., The effect of the MDCK cell selected neuraminidase D151G mutation on the drug susceptibility assessment of influenza A (H3N2) viruses. *Antiviral research* 2014, 101, 93-96.
4. Lee, M.; Deng, M.; Lin, Y.; Chang, C.; Shieh, H. K.; Shiau, J.; Huang, C., Characterization of an H5N1 avian influenza virus from Taiwan. *Veterinary microbiology* 2007, 124 (3-4), 193-201.
5. Katz, J. M.; Lu, X.; Tumpey, T. M.; Smith, C. B.; Shaw, M. W.; Subbarao, K., Molecular correlates of influenza A H5N1 virus pathogenesis in mice. *Journal of virology* 2000, 74 (22), 10807-10810.
6. To, K. K.-W.; Song, W.; Lau, S.-Y.; Que, T.-L.; Lung, D. C.; Hung, I. F.-N.; Chen, H.; Yuen, K.-Y., Unique reassortant of influenza A (H7N9) virus associated with severe disease emerging in Hong Kong. *Journal of Infection* 2014, 69 (1), 60-68.
7. Li, J.; Ishaq, M.; Prudence, M.; Xi, X.; Hu, T.; Liu, Q.; Guo, D., Single mutation at the amino acid position 627 of PB2 that leads to increased virulence of an H5N1 avian influenza virus during adaptation in mice can be compensated by multiple mutations at other sites of PB2. *Virus research* 2009, 144 (1-2), 123-129.
8. Prokopyeva, E.; Sobolev, I.; Prokopyev, M.; Shestopalov, A., Adaptation of influenza A (H1N1) pdm09 virus in experimental mouse models. *Infection, genetics and evolution* 2016, 39, 265-271.
9. Salomon, R.; Franks, J.; Govorkova, E. A.; Ilyushina, N. A.; Yen, H.-L.; Hulse-Post, D. J.; Humberd, J.; Trichet, M.; Rehg, J. E.; Webby, R. J., The polymerase complex genes contribute to the high virulence of the human H5N1 influenza virus isolate A/Vietnam/1203/04. *Journal of Experimental Medicine* 2006, 203 (3), 689-697.
10. Govorkova, E. A.; Rehg, J. E.; Krauss, S.; Yen, H.-L.; Guan, Y.; Peiris, M.; Nguyen, T. D.; Hanh, T. H.; Puthavathana, P.; Long, H. T., Lethality to ferrets of H5N1 influenza viruses isolated from humans and poultry in 2004. *Journal of virology* 2005, 79 (4), 2191-2198.
11. Gabriel, G.; Dauber, B.; Wolff, T.; Planz, O.; Klenk, H.-D.; Stech, J., The viral polymerase mediates adaptation of an avian influenza virus to a mammalian host. *Proceedings of the National Academy of Sciences* 2005, 102 (51), 18590-18595.
12. Gabriel, G.; Herwig, A.; Klenk, H.-D., Interaction of polymerase subunit PB2 and NP with importin  $\alpha$ 1 is a determinant of host range of influenza A virus. *PLoS pathogens* 2008, 4 (2), e11.
13. Hulse-Post, D.; Franks, J.; Boyd, K.; Salomon, R.; Hoffmann, E.; Yen, H.; Webby, R.; Walker, D.; Nguyen, T.; Webster, R., Molecular changes in the polymerase genes (PA and PB1) associated with high pathogenicity of H5N1 influenza virus in mallard ducks. *Journal of virology* 2007, 81 (16), 8515-8524.
14. Taubenberger, J. K.; Reid, A. H.; Lourens, R. M.; Wang, R.; Jin, G.; Fanning, T. G., Characterization of the 1918 influenza virus polymerase genes. *Nature* 2005, 437 (7060), 889.

15. Leung, B. W.; Chen, H.; Brownlee, G. G., Correlation between polymerase activity and pathogenicity in two duck H5N1 influenza viruses suggests that the polymerase contributes to pathogenicity. *Virology* 2010, 401 (1), 96-106.
16. Mei, K.; Liu, G.; Chen, Z.; Gao, Z.; Zhao, L.; Jin, T.; Yu, X.; Chen, Q., Deep sequencing reveals the viral adaptation process of environment-derived H10N8 in mice. *Infection, Genetics and Evolution* 2016, 37, 8-13.
17. Zhu, W.; Zou, X.; Zhou, J.; Tang, J.; Shu, Y., Residues 41V and/or 210D in the NP protein enhance polymerase activities and potential replication of novel influenza (H7N9) viruses at low temperature. *Virology journal* 2015, 12 (1), 71.
18. Wasilenko, J. L.; Sarmiento, L.; Pantin-Jackwood, M. J., A single substitution in amino acid 184 of the NP protein alters the replication and pathogenicity of H5N1 avian influenza viruses in chickens. *Archives of virology* 2009, 154 (6), 969-979.
19. El-Shesheny, R.; Kandeil, A.; Bagato, O.; Maatouq, A. M.; Moatasim, Y.; Rubrum, A.; Song, M. S.; Webby, R. J.; Ali, M. A.; Kayali, G., Molecular characterization of avian influenza H5N1 virus in Egypt and the emergence of a novel endemic subclade. *J Gen Virol* 2014, 95 (Pt 7), 1444-63.
20. Lycett, S.; Ward, M.; Lewis, F.; Poon, A.; Pond, S. K.; Brown, A. L., Detection of mammalian virulence determinants in highly pathogenic avian influenza H5N1 viruses: multivariate analysis of published data. *Journal of virology* 2009, 83 (19), 9901-9910.
21. Jiao, P.; Tian, G.; Li, Y.; Deng, G.; Jiang, Y.; Liu, C.; Liu, W.; Bu, Z.; Kawaoka, Y.; Chen, H., A single-amino-acid substitution in the NS1 protein changes the pathogenicity of H5N1 avian influenza viruses in mice. *Journal of virology* 2008, 82 (3), 1146-1154.
22. Fan, S.; Deng, G.; Song, J.; Tian, G.; Suo, Y.; Jiang, Y.; Guan, Y.; Bu, Z.; Kawaoka, Y.; Chen, H., Two amino acid residues in the matrix protein M1 contribute to the virulence difference of H5N1 avian influenza viruses in mice. *Virology* 2009, 384 (1), 28-32.
23. Kageyama, T.; Fujisaki, S.; Takashita, E.; Xu, H.; Yamada, S.; Uchida, Y.; Neumann, G.; Saito, T.; Kawaoka, Y.; Tashiro, M., Rapid communication Genetic analysis of novel avian A (H7N9) influenza viruses isolated from patients in China, February to April 2013. *Euro surveillance: bulletin Europeen sur les maladies transmissibles= European communicable disease bulletin* 2013, 18 (15), 20453.



HA

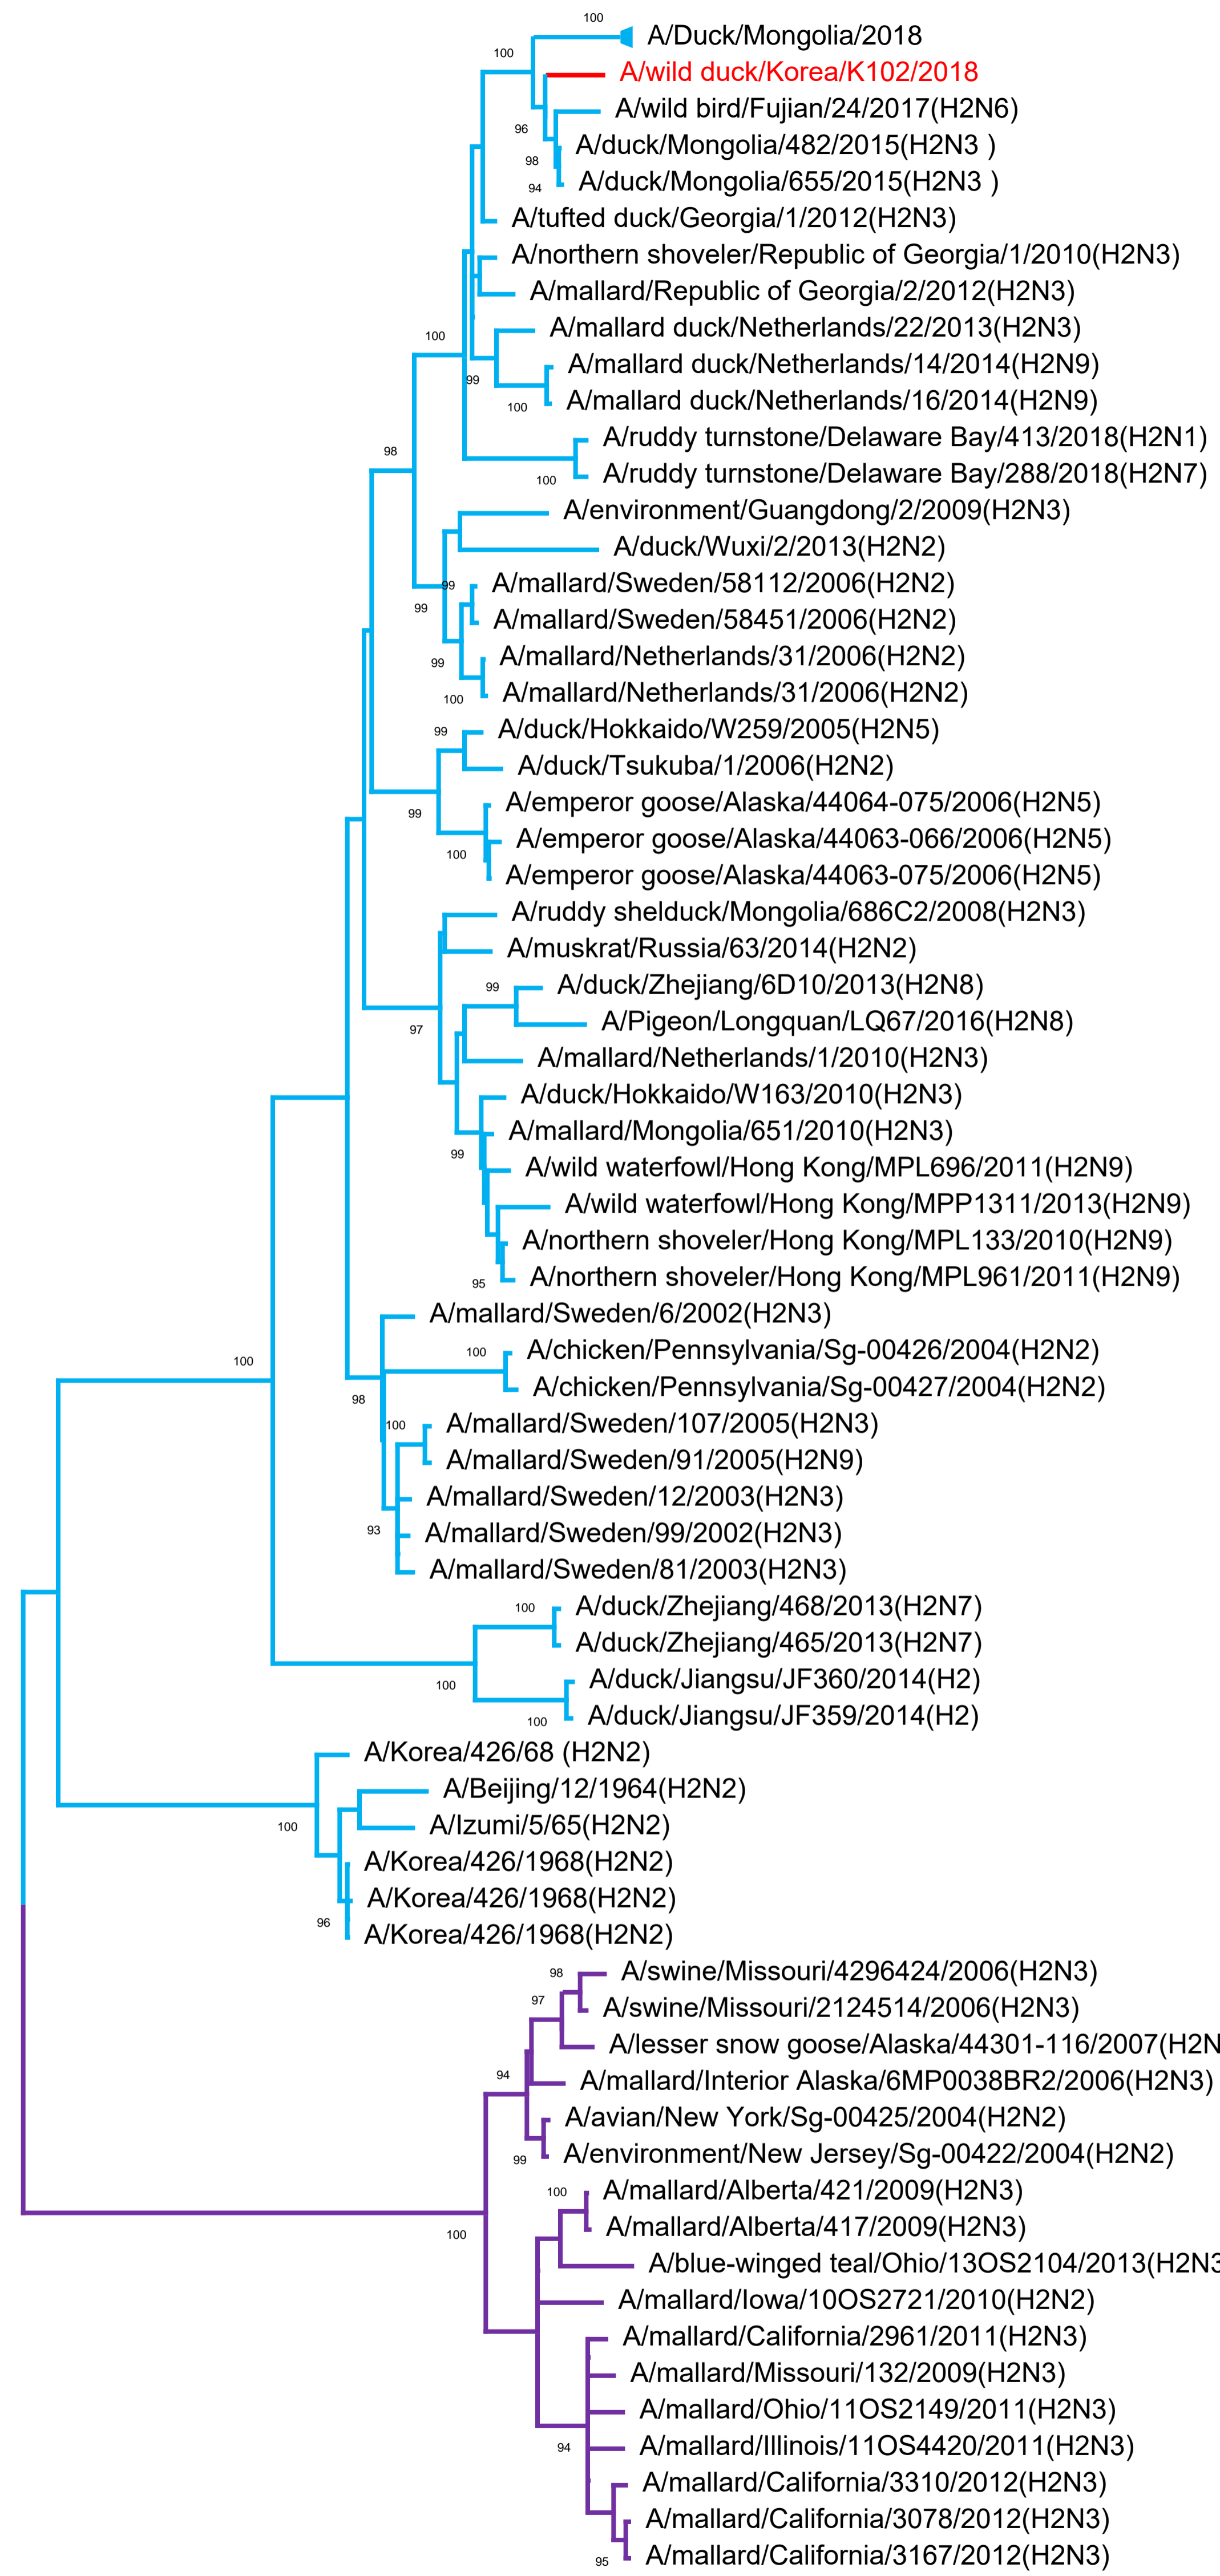

Eurasian lineage

North American lineage

0.020

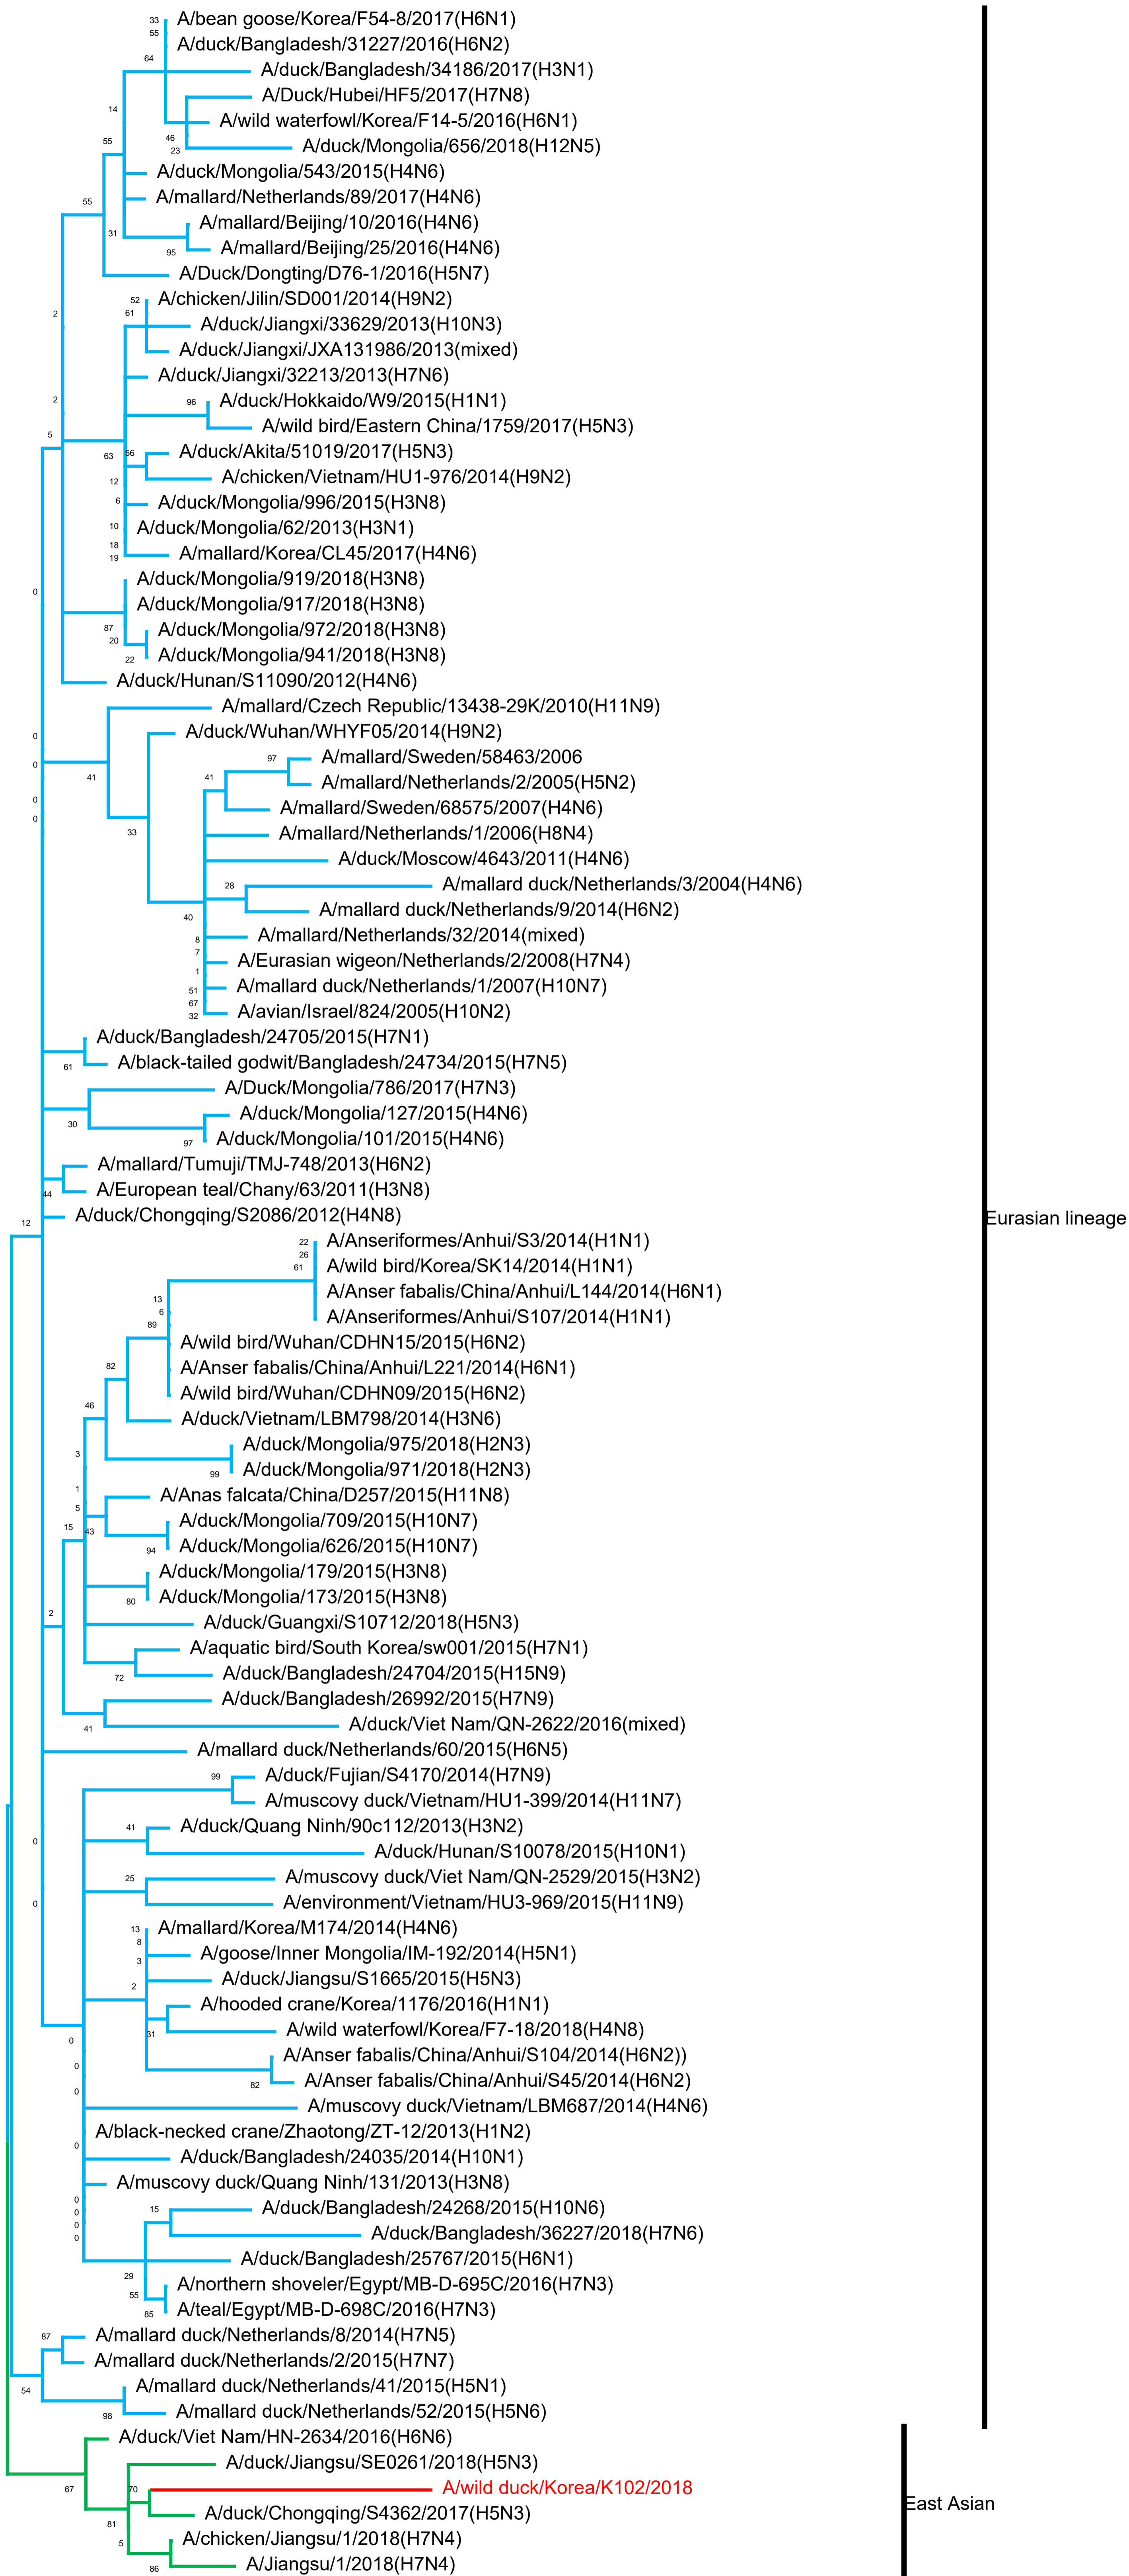

Eurasian lineage

East Asian

0.0050

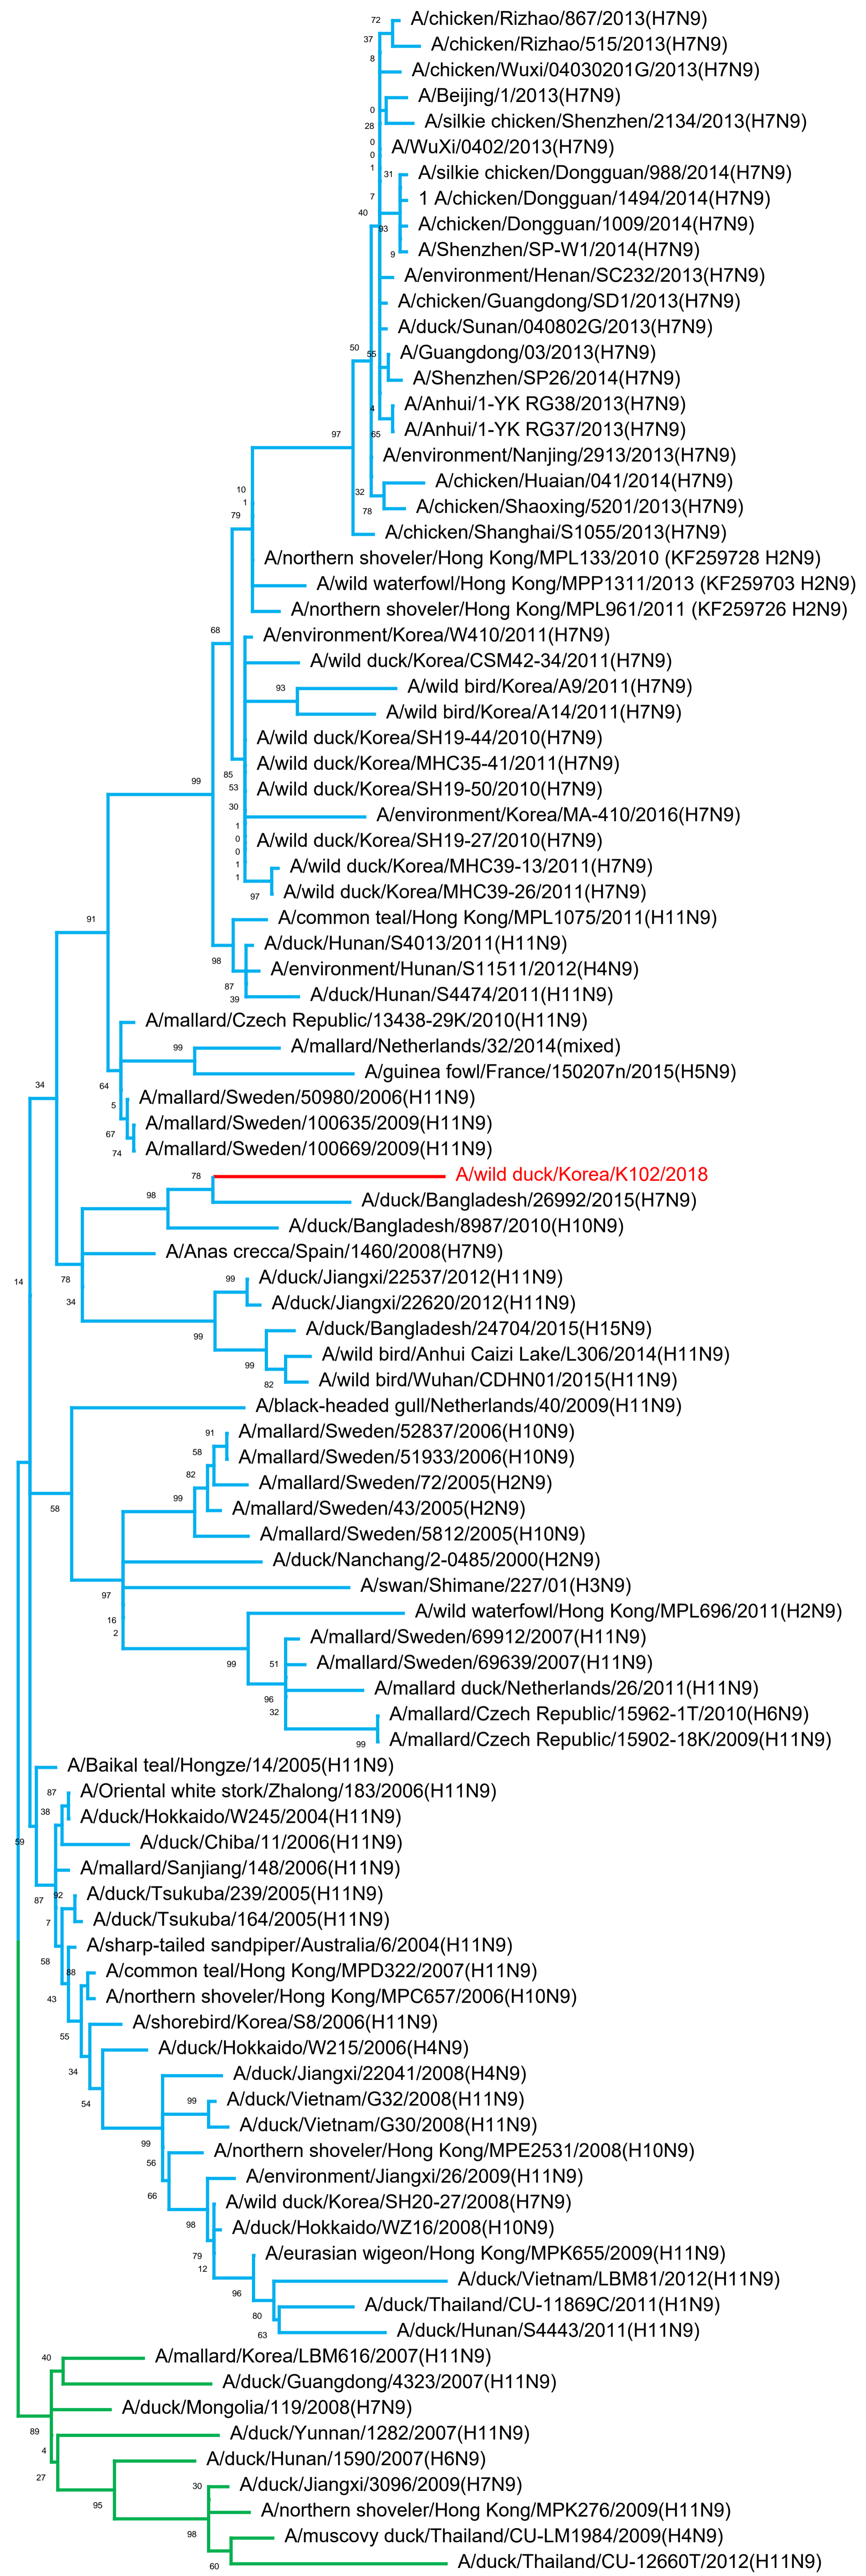

NA

Eurasian lineage

East Asia

0.010

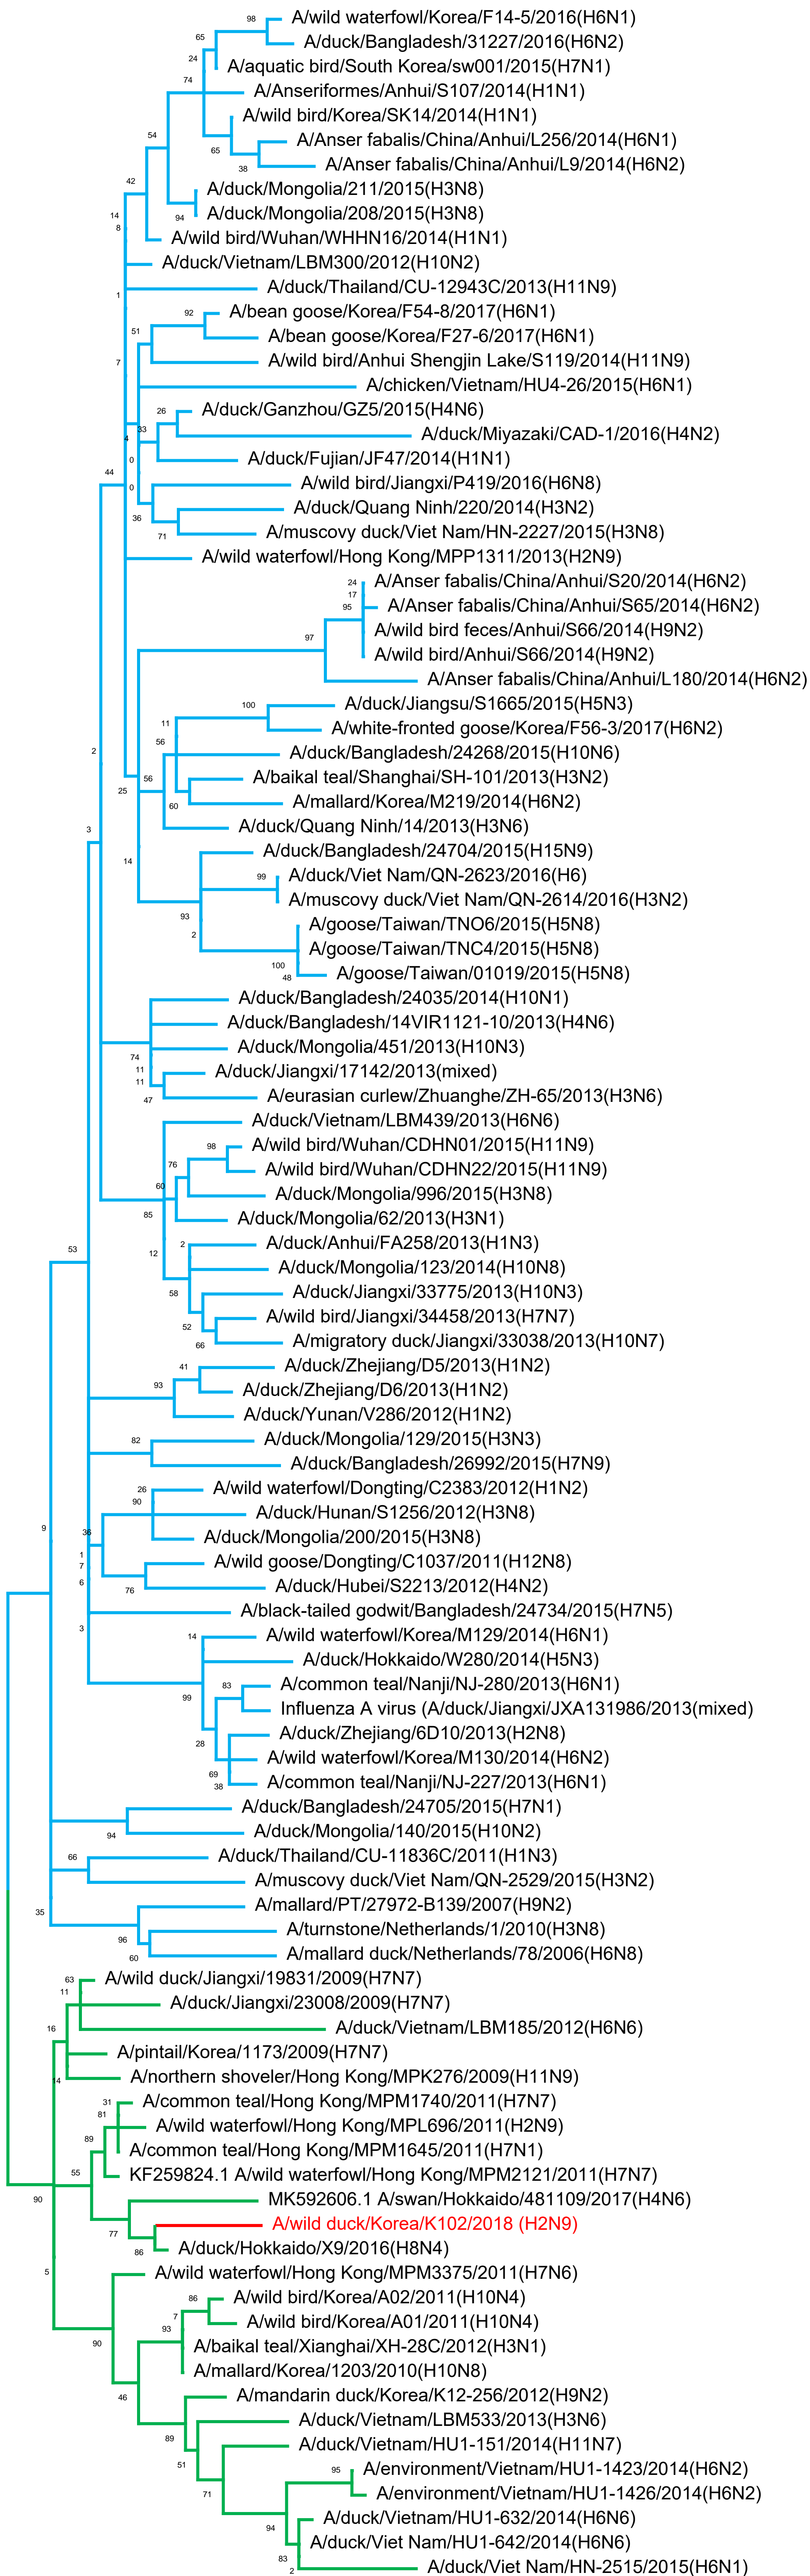

Eurasian lineage

East Asia

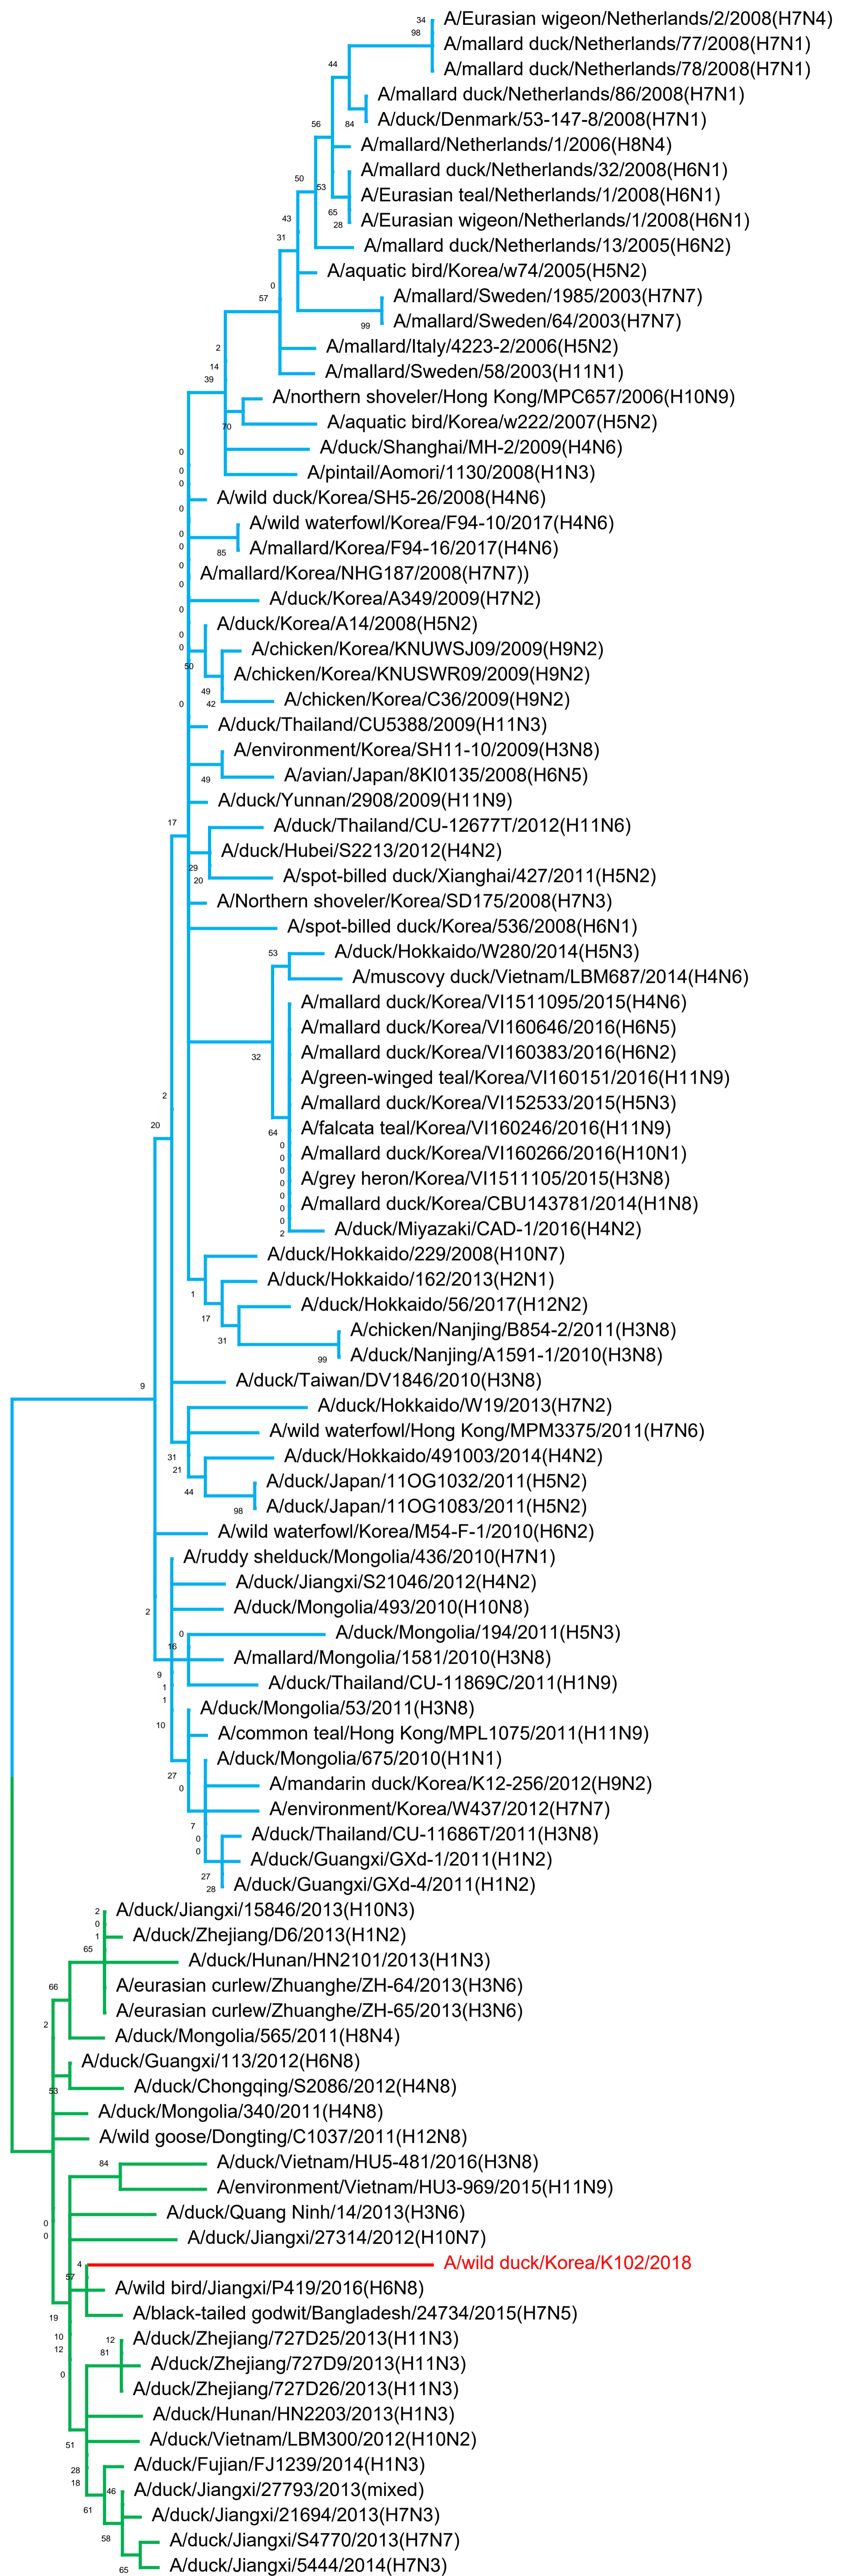

NS

Eurasian lineage

East Asia

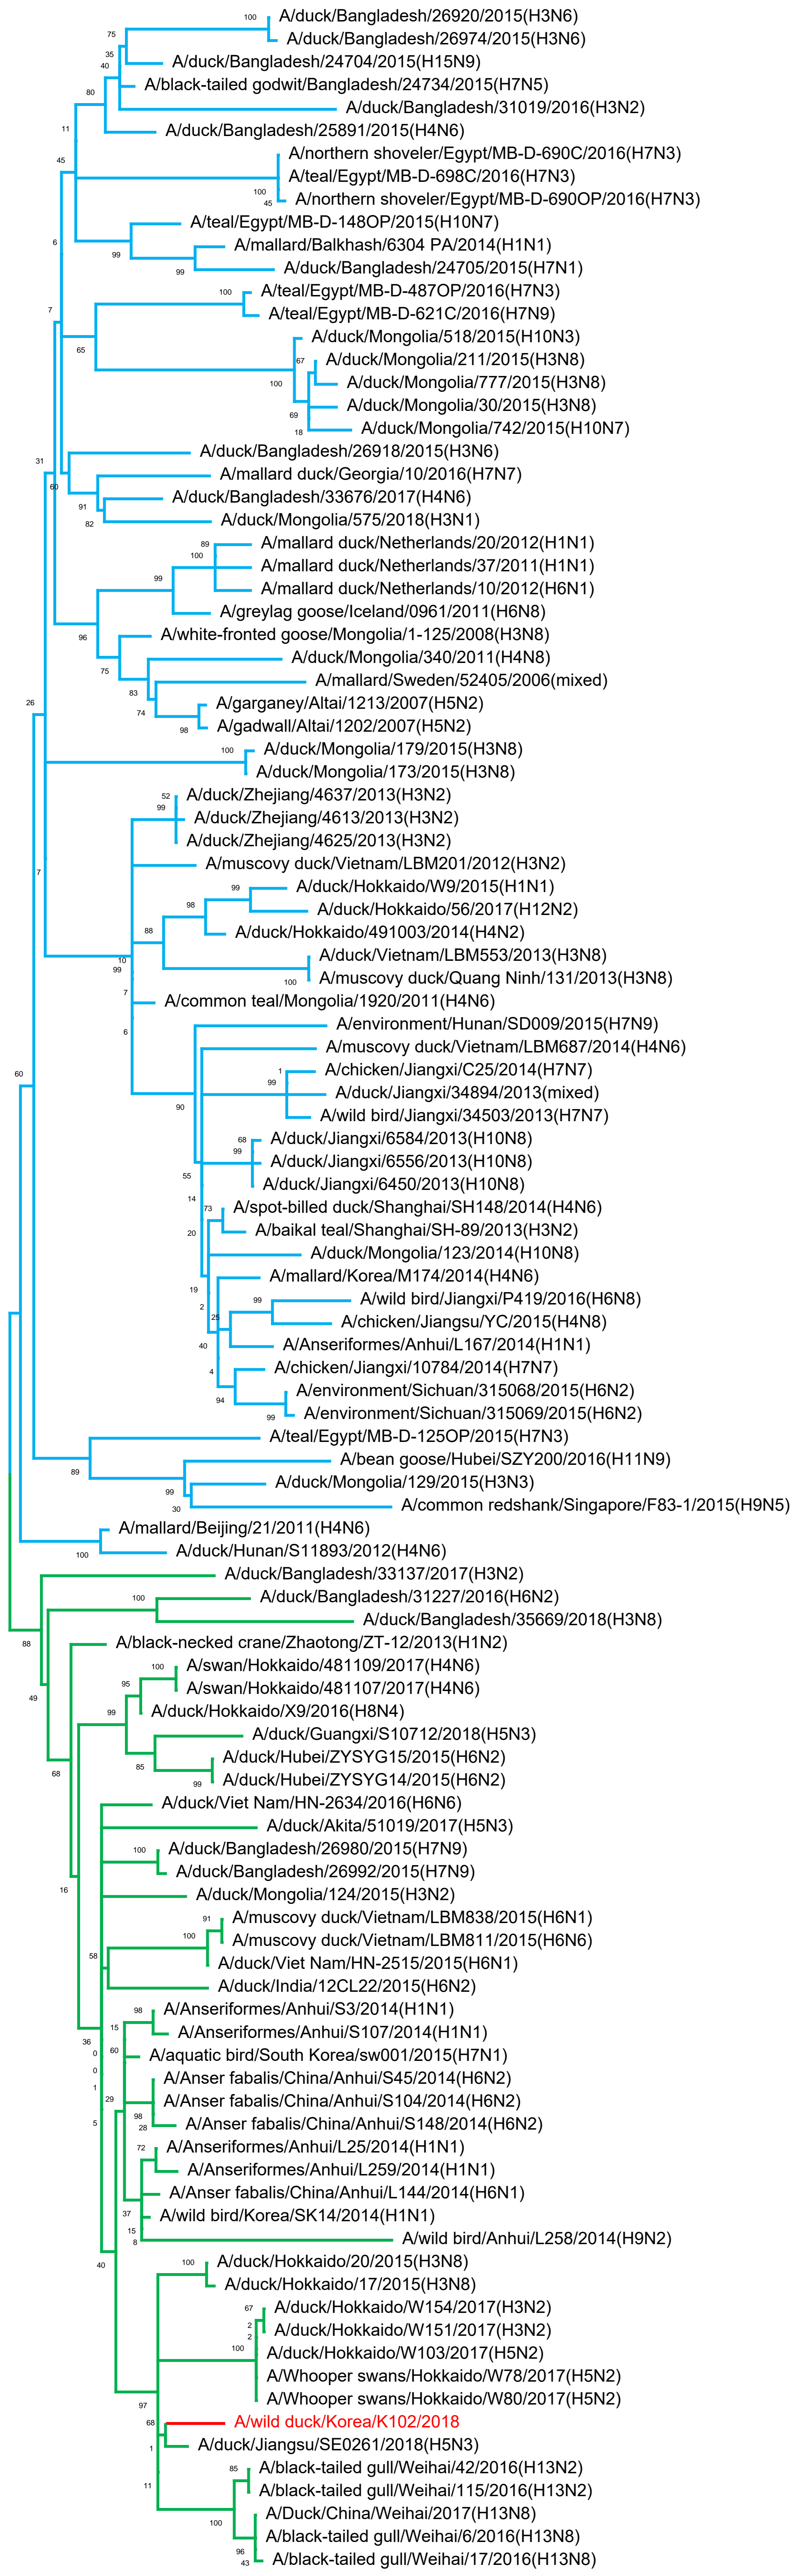

Eurasian lineage

East Asia

PB1

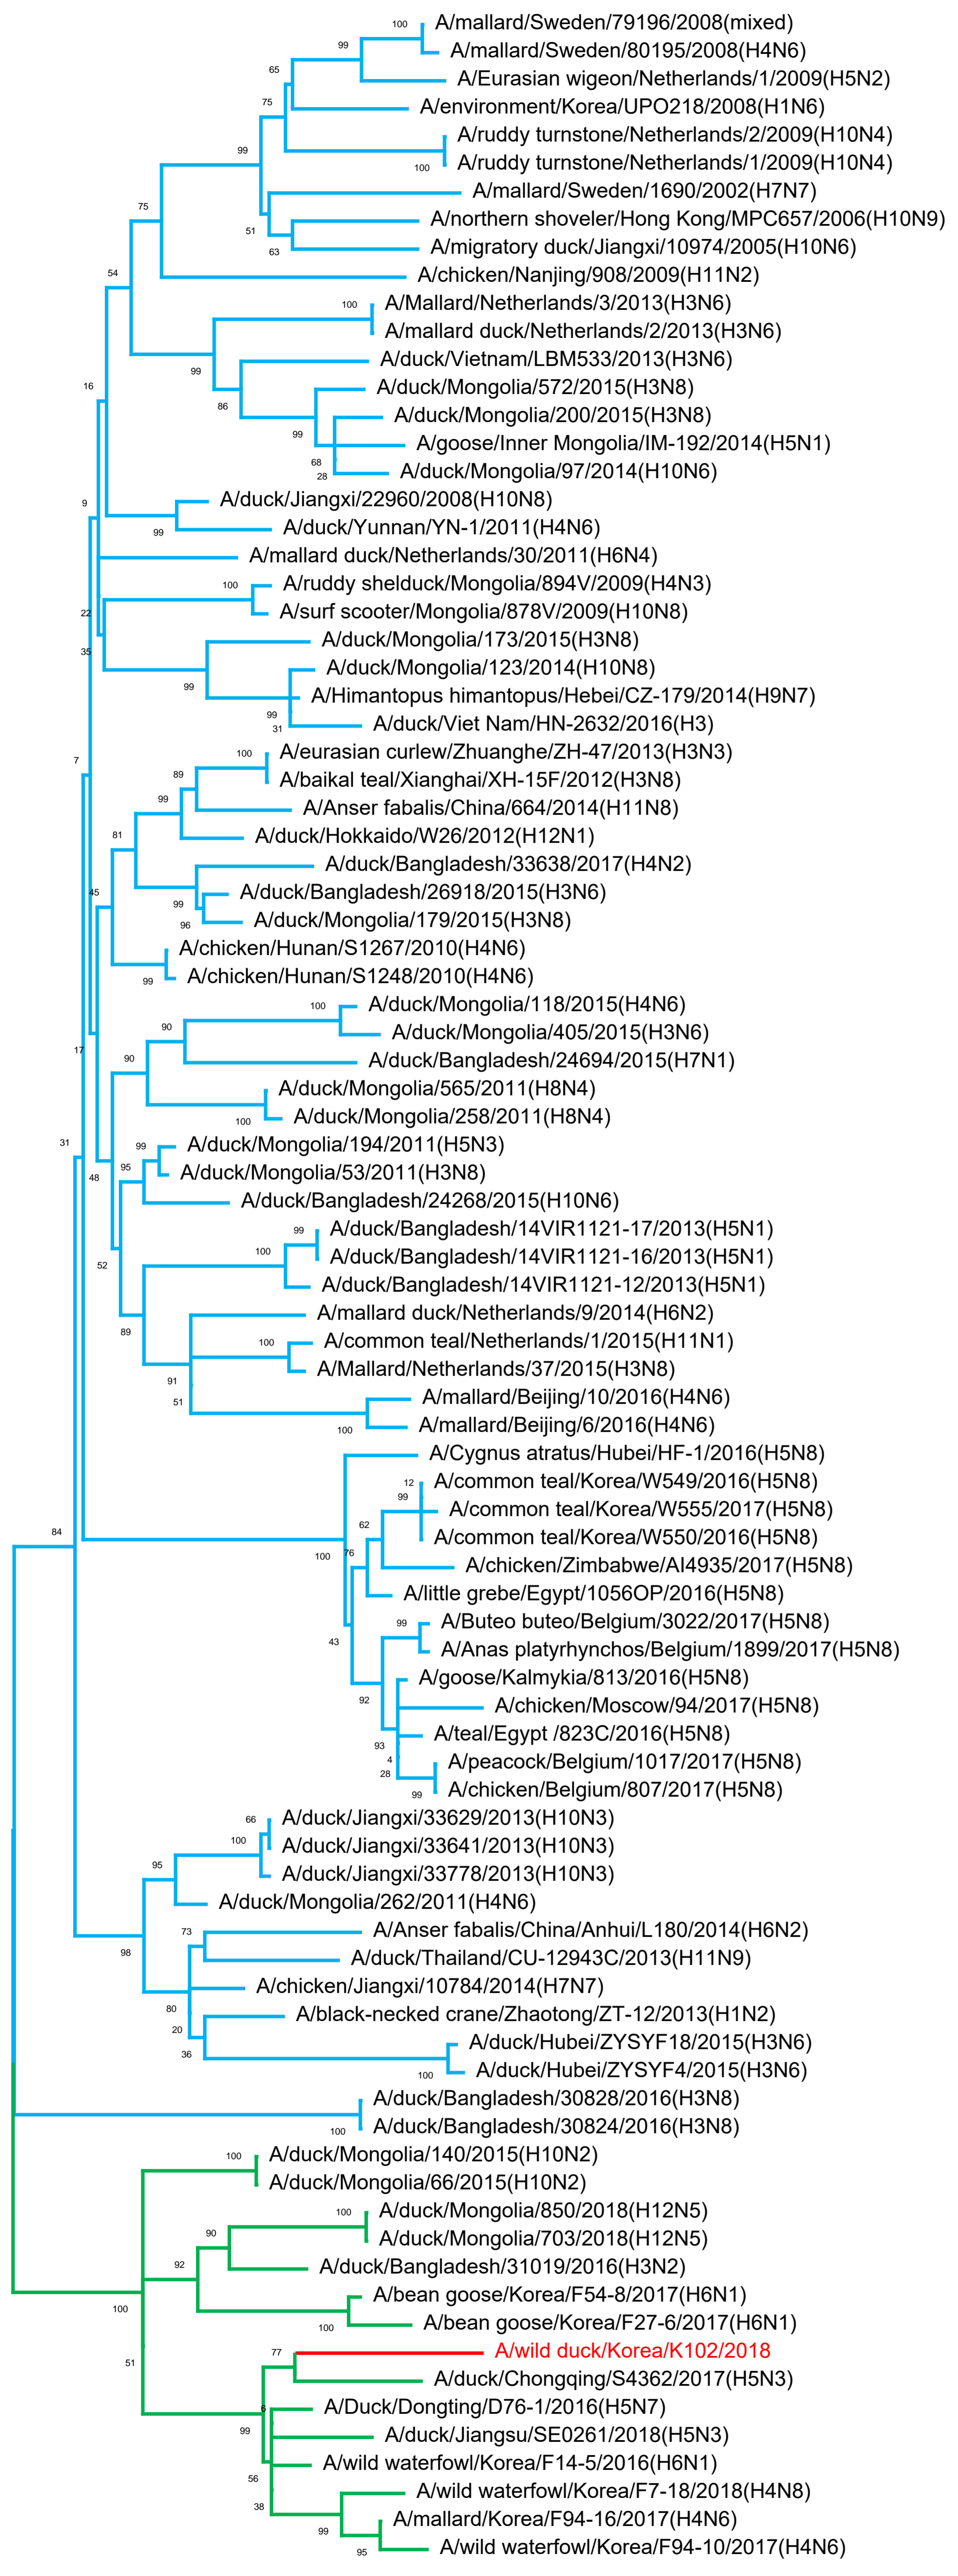

Eurasian lineage

East Asia

0.0050

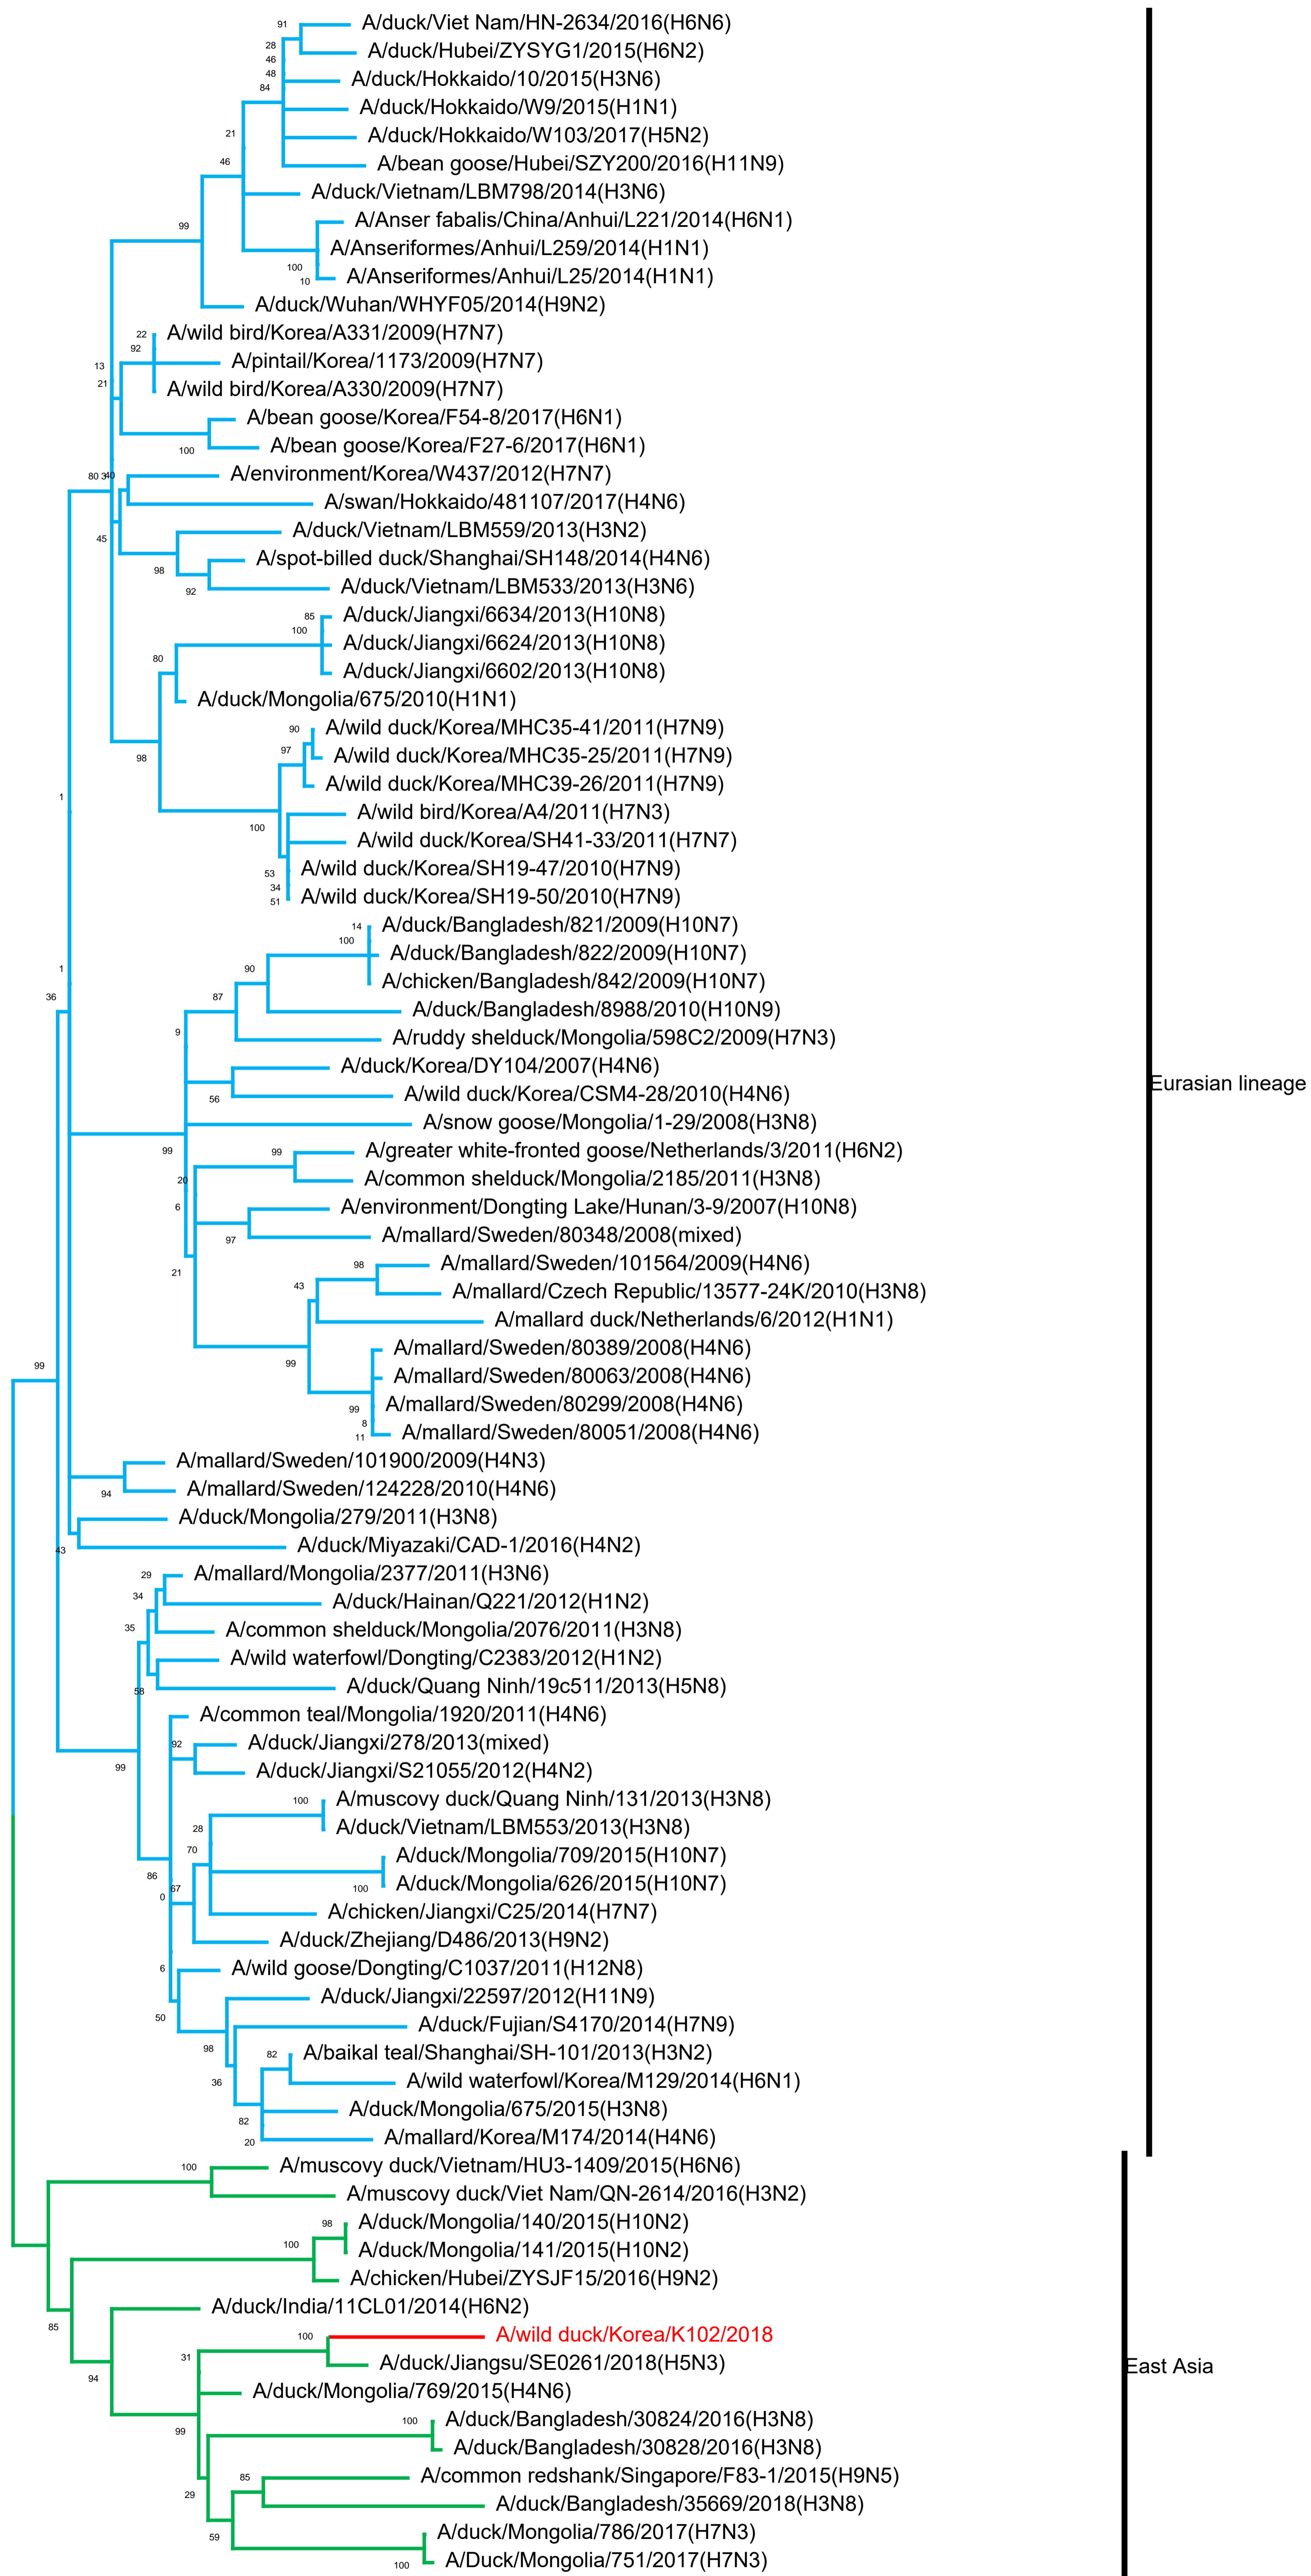

0.0050
